# Supplementary material for: A DFT study on the effect of oxygen vacancies and H2O in Mn-MOF-74 on SCR reactions
Source: Royal Society of Chemistry journal article supplement (doi:10.1039/c9cp02640a), 2019-01-01

## Supporting Information

### **DFT study on the effect of oxygen vacancy and H<sub>2</sub>O in Mn-MOF-74 on SCR reaction**

Minhua Zhang<sup>a,b</sup>, Kun Gu<sup>a,b</sup>, Xuewei Huang<sup>a,b</sup> and Yifei Chen<sup>a,b,\*</sup>

<sup>a</sup> Key Laboratory for Green Chemical Technology of Ministry of Education, R&D Center for Petrochemical Technology, Tianjin University, Tianjin 300072, P R China

<sup>b</sup> Collaborative Innovation Center of Chemical Science and Engineering, Tianjin 300072, China

**This file includes:**

Tables S1 to S4

The effect of H<sub>2</sub>O on oxygen vacancy

Table S1 Charge transfer of four concerned molecules after adsorption on carboxyl oxygen vacancy.

| Atomic species | Framework of<br>Mn-MOF-74 | Mulliken charge ( $ e $ ) |        |                |                 |
|----------------|---------------------------|---------------------------|--------|----------------|-----------------|
|                |                           | NH <sub>3</sub>           | NO     | O <sub>2</sub> | NO <sub>2</sub> |
| Mn             | 0.497                     | 0.580                     | 0.512  | 0.615          | 0.540           |
| O*             | -0.539                    | -0.549                    | -0.551 | -0.552         | -0.559          |
| N              | -                         | -0.434                    | 0.024  | -              | 0.302           |
| O              | -                         | -                         | -0.162 | -              | -               |
| O1             | -                         | -                         | -      | -0.158         | -0.285          |
| O2             | -                         | -                         | -      | -0.127         | -0.288          |
| Net charge     | -                         | 0.144                     | -0.138 | -0.285         | -0.271          |

Notes : O\* is hydroxyl oxygen, O is O atom of NO; O1 and O2 represent the oxygen atoms in the O<sub>2</sub> and NO<sub>2</sub>, respectively.

Table S2 Charge transfer situation of four concerned molecules after adsorption on hydroxyl oxygen vacancy.

| Atomic species | Framework of<br>Mn-MOF-74 | Mulliken charge ( $ e $ ) |        |                |                 |
|----------------|---------------------------|---------------------------|--------|----------------|-----------------|
|                |                           | NH <sub>3</sub>           | NO     | O <sub>2</sub> | NO <sub>2</sub> |
| Mn             | 0.473                     | 0.657                     | 0.584  | 0.684          | 0.621           |
| O*             | -0.551                    | -0.465                    | -0.454 | -0.449         | -0.491          |
| N              | -                         | -0.433                    | 0.021  | -              | 0.293           |
| O              | -                         | -                         | -0.171 | -              | -               |
| O1             | -                         | -                         | -      | -0.157         | -0.291          |
| O2             | -                         | -                         | -      | -0.133         | -0.286          |
| Net charge     | -                         | 0.129                     | -0.150 | -0.290         | -0.284          |

Table S3 Changes of Mn-O bond lengths before and after H<sub>2</sub>O adsorption.

| Key name | Bond length /Å            |                                                 |                                                 |
|----------|---------------------------|-------------------------------------------------|-------------------------------------------------|
|          | Framework of<br>Mn-MOF-74 | Adsorption of two H <sub>2</sub> O<br>molecules | Adsorption of six H <sub>2</sub> O<br>molecules |
| Mn-O1*   | 2.019                     | 2.166                                           | 2.117                                           |
| Mn-O2*   | 1.956                     | 2.045                                           | 2.078                                           |

Table S4 Lattice parameter changes of Mn-MOF-74 (hexagonal) before and after H<sub>2</sub>O adsorption.

| Mn-MOF-74<br>Lattice parameter | Before adsorption | Adsorption of two H <sub>2</sub> O<br>molecules | Adsorption of six H <sub>2</sub> O<br>molecules |
|--------------------------------|-------------------|-------------------------------------------------|-------------------------------------------------|
| <i>a</i> (Å)                   | 15.1065           | 15.3229                                         | 15.3410                                         |
| <i>b</i> (Å)                   | 15.1065           | 15.0376                                         | 15.3231                                         |
| <i>c</i> (Å)                   | 15.1065           | 15.6279                                         | 15.4401                                         |
| <i>a</i> (degree)              | 117.8214          | 117.9977                                        | 118.0588                                        |
| <i>b</i> (degree)              | 117.8214          | 119.8679                                        | 118.1399                                        |
| $\gamma$ (degree)              | 117.8214          | 115.4766                                        | 117.1774                                        |

### **The effect of H<sub>2</sub>O on oxygen vacancy**

The adsorption of H<sub>2</sub>O on metal sites containing oxygen vacancies were calculated. Table S5 lists the changes of Mn-O bond lengths before and after H<sub>2</sub>O adsorbed in MOF-74-O<sub>Vcarboxyl</sub> and MOF-74-O<sub>Vhydroxyl</sub>. Different from the bond length stretching after H<sub>2</sub>O adsorption in perfect crystals, in the oxygen vacancies containing structure, only the Mn-O4\* bond was elongated and the other bonds were shorten. It indicates that the metal sites moves closer to oxygen vacancies after the adsorption of H<sub>2</sub>O. The movement of metal sites is shown in the Fig.S1. The effect of H<sub>2</sub>O on two kinds of oxygen vacancy are almost the same.

Table S5 changes of Mn-O bond lengths before and after H2O adsorption.

| Bond length /Å |                         |                  |                         |                  |
|----------------|-------------------------|------------------|-------------------------|------------------|
| Bond name      | Carboxyl oxygen vacancy |                  | Hydroxyl oxygen vacancy |                  |
|                | Before adsorption       | After adsorption | Before adsorption       | After adsorption |
| Mn-O1*         | 2.064                   | 1.930            | 2.030                   | 1.968            |
| Mn-O2*         | 1.934                   | 2.048            | 2.034                   | 1.975            |
| Mn-O3*         | 2.156                   | 2.095            | 2.060                   | 2.032            |
| Mn-O4*         | 2.195                   | 2.284            | 2.114                   | 2.304            |

Fig.S1 Change of the position of Mn metal site (a) carboxyl oxygen vacancy (b) hydroxyl oxygen vacancy.

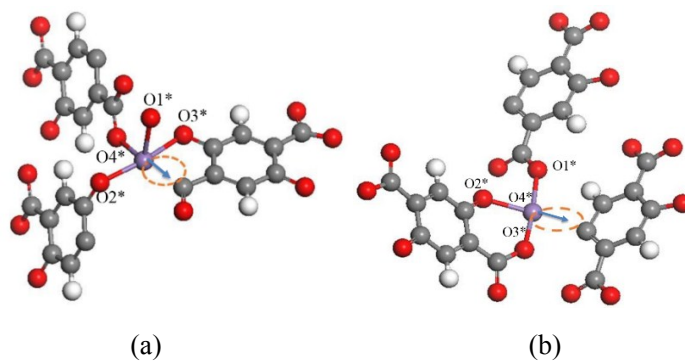

Supplement: c9cp02640a1.pdf [file c9cp02640a1.pdf]
